# Supplementary material for: Transcranial Direct-Current Stimulation and Behavioral Training, a Promising Tool for a Tailor-Made Post-stroke Aphasia Rehabilitation: A Review
Source: PubMed Central journal article supplement (PMC8722401; doi:10.3389/fnhum.2021.742136), 2021-12-20
Supplement: Table_1.pdf [file Table_1.pdf]

| Supplementary Table 1: Experimental Studies |      |                                                         |                              |                                                                                                                                                                                             |           |                              |                                                             |                                               |                                         |
|---------------------------------------------|------|---------------------------------------------------------|------------------------------|---------------------------------------------------------------------------------------------------------------------------------------------------------------------------------------------|-----------|------------------------------|-------------------------------------------------------------|-----------------------------------------------|-----------------------------------------|
| Author(s)                                   | Year | Sample                                                  | tDCS montage                 | Stimulation site                                                                                                                                                                            | Intensity | Duration of tDCS stimulation | Number of tDCS sessions                                     | Duration of treatment                         | Paired task                             |
| Kang et al.                                 | 2007 | 5 patients with chronic aphasia                         | C-tDCS                       | Broca's homologous areas of the right hemisphere                                                                                                                                            | 2mA       | 20 min                       | 5                                                           | 5 days                                        | Speech Therapy                          |
| Vines et al.                                | 2009 | 6 patients with chronic aphasia                         | A-tDCS                       | Right IFG                                                                                                                                                                                   | 1.2 mA    | 20 min                       | 3 per condition                                             | 6 days                                        | Melodic Intonation Therapy              |
| Baker et al.                                | 2010 | 10 patients with chronic aphasia                        | A-tDCS                       | Left perilesional areas                                                                                                                                                                     | 1 mA      | 20 min                       | 5 active, 5 sham                                            | 5 days + 1 week interval between conditions   | Picture-Word Matching Task              |
| Fiori et al.                                | 2011 | 3 patients with chronic aphasia and 10 healthy subjects | A-tDCS                       | Wernicke's Area                                                                                                                                                                             | 1 mA      | 20 min                       | 5 active, 5 sham                                            | 2 weeks + 1 week interval between conditions  | Picture Naming Task                     |
| Floëel et al.                               | 2011 | 12 patients with chronic aphasia                        | A-tDCS or C-tDCS             | Right temporo-parietal areas                                                                                                                                                                | 1 mA      | 20 min                       | 3 (1 active anodal, 1 active cathodal, 1 sham. Randomized.) | 3 days + 3 week interval between conditions   | Anomia Training                         |
| Fridriksson et al.                          | 2011 | 8 patients with chronic aphasia                         | A-tDCS                       | Perilesional areas                                                                                                                                                                          | 1 mA      | 20 min                       | 5 active, 5 sham                                            | 2 weeks + 1 week interval between conditions  | Computerised Anomia Treatment           |
| Jung et al.                                 | 2011 | 37 patients with chronic aphasia                        | C-tDCS                       | Broca's homologous areas of the right hemisphere                                                                                                                                            | 1 mA      | 30 min                       | 10                                                          | 2 to 3 weeks                                  | Speech and Language Therapy             |
| Kang et al.                                 | 2011 | 10 patients with chronic aphasia                        | C-tDCS                       | Broca's homologous areas of the right hemisphere                                                                                                                                            | 2 mA      | 20 min                       | 5 active, 5 sham                                            | 2 weeks + 1 week interval between conditions  | Word Retrieval Training                 |
| Marangolo et al.                            | 2011 | 3 patients with chronic aphasia                         | A-tDCS                       | Broca's Area                                                                                                                                                                                | 1 mA      | 20 min                       | 5 active, 5 sham                                            | 2 weeks + 6 days interval between conditions  | Word Repetition Task                    |
| Vines et al.                                | 2011 | 6 patients with chronic aphasia                         | A-tDCS                       | Broca's homologous areas of the right hemisphere                                                                                                                                            | 1.2 mA    | 20 min                       | 3 active, 3 sham                                            | 6 days + 1 week interval between conditions   | Melodic Intonation Therapy              |
| Saidmanesh et al.                           | 2012 | 20 patients with chronic aphasia                        | A-tDCS                       | Left prefrontal dorsolateral areas                                                                                                                                                          | 2 mA      | 20 min                       | 10 active, 10 sham                                          | 20 days + 1 week interval between conditions  | Verbal fluency and working memory tasks |
| Fiori et al.                                | 2013 | 7 patients with chronic aphasia                         | A-tDCS                       | Left frontal and temporal areas                                                                                                                                                             | 1 mA      | 20 min                       | 5 for each condition, 5 sham                                | 15 days + 6 days interval between conditions  | Picture-Naming Task                     |
| Lee et al.                                  | 2013 | 11 patients with chronic aphasia                        | A-tDCS or bihemispheric tDCS | Two pairs of electrodes employed: (1) anode on Broca's area and reference on left buccinator muscle; (2) cathode on Broca's right homologous areas and reference on right buccinator muscle | 2 mA      | 30 min                       | 2                                                           | 2 days + 1 day interval between conditions    | Speech and Language Therapy             |
| Marangolo et al.                            | 2013 | 7 patients with chronic aphasia                         | A-tDCS                       | Broca's or Wernicke's Areas                                                                                                                                                                 | 1 mA      | 20 min                       | 5 per condition                                             | 15 days + 6 days interval between conditions  | Naming Task                             |
| Marangolo et al.                            | 2013 | 12 patients with chronic aphasia                        | A-tDCS                       | Broca's Area                                                                                                                                                                                | 1 mA      | 20 min                       | 5 active, 5 sham                                            | 2 weeks + 14 days interval between conditions | Conversational Therapy                  |
| Marangolo et al.                            | 2013 | 8 patients with chronic aphasia                         | Bihemispheric stimulation    | Anode on Broca's area, cathode on right homologous areas                                                                                                                                    | 2 mA      | 20 min                       | 10 active, 10 sham                                          | 20 days + 14 days interval between sessions   | Language Therapy for apraxia            |

|                    |      |                                                                    |                                   |                                                                                  |        |        |                                                        |                                                                       |                                                                                                                                |
|--------------------|------|--------------------------------------------------------------------|-----------------------------------|----------------------------------------------------------------------------------|--------|--------|--------------------------------------------------------|-----------------------------------------------------------------------|--------------------------------------------------------------------------------------------------------------------------------|
| Marangolo et al.   | 2014 | 7 patients with chronic aphasia                                    | Bihemispheric stimulation         | Anode on perilesional areas, cathode on homologous areas of the right hemisphere | 2 mA   | 20 min | 10 active, 10 sham                                     | 20 days + 14 days interval between sessions                           | Speech and Language Therapy                                                                                                    |
| Marangolo et al.   | 2014 | 8 patients with chronic aphasia and 20 healthy subjects            | A-tDCS                            | Broca's or Wernicke's Areas                                                      | 1 mA   | 20 min | 20 active, 10 sham                                     | 30 days + 14 days interval between sessions                           | Conversational Therapy                                                                                                         |
| Rosso et al.       | 2014 | 25 patients with chronic aphasia                                   | C-tDCS                            | Left personalised montage based on the lesion site                               | 1 mA   | 15 min | 1 active, 1 sham                                       | 1 day + 2 hours interval between sessions                             | Picture Naming Task                                                                                                            |
| Vestito et al.     | 2014 | 3 patients with chronic aphasia                                    | A-tDCS                            | Perilesional areas                                                               | 1.5 mA | 20 min | 5 active, 5 sham                                       | 5 days (both conditions every day) + 2 days interval between sessions | Naming Task                                                                                                                    |
| Campana et al.     | 2015 | 20 patients with chronic aphasia                                   | A-tDCS                            | Broca's Area                                                                     | 2 mA   | 20 min | 5 active, 5 sham                                       | 1 week + 14 days interval between conditions                          | Conversational Therapy                                                                                                         |
| Cipollari et al.   | 2015 | 6 patients with chronic aphasia                                    | A-tDCS or C-tDCS                  | Broca's homologous areas of the right hemisphere                                 | 2 mA   | 20 min | 15 active per condition                                | 3 weeks + 14 days interval between conditions                         | Melodic Intonation Therapy                                                                                                     |
| De Aguiar et al.   | 2015 | 9 patients with chronic aphasia                                    | Bihemispheric tDCS                | Anode on perilesional areas, cathode on homologous areas of the right hemisphere | 1 mA   | 20 min | 10 active, 10 sham                                     | 10 weeks                                                              | SLT based on ACTION treatment                                                                                                  |
| Richardson et al.  | 2015 | 8 patients with chronic aphasia                                    | A-tDCS (conventional and HD-tDCS) | Personalised montage on left frontal lobe                                        | 1 mA   | 20 min | 5 per condition                                        | 5 weeks                                                               | Computerised Anomia Treatment                                                                                                  |
| Shah-Basak et al.  | 2015 | 1st phase: 12 patients with chronic aphasia; 2nd phase: 5 patients | A-tDCS or C-tDCS                  | Frontal personalised montage                                                     | 2 mA   | 20 min | 1st phase: 4<br>2nd phase: 10                          | 2 weeks per condition                                                 | Picture Naming Task                                                                                                            |
| Basat et al.       | 2016 | 7 patients with chronic aphasia                                    | A-tDCS or C-tDCS                  | Broca's or Wernicke's Areas                                                      | 2 mA   | 10 min | 6 active, 6 sham                                       | 2 weeks                                                               | Psycholinguistic Assessment of Language Processing in Aphasia (PALPA), Written Word Association test, Picture Association test |
| Marangolo et al.   | 2016 | 9 patients with chronic aphasia                                    | Bihemispheric stimulation         | Anode on Broca's Area, cathode on right homologous areas                         | 2 mA   | 20 min | 5 per condition                                        | 3 weeks                                                               | Speech and Language Therapy                                                                                                    |
| Meinzer et al.     | 2016 | 26 patients with chronic aphasia                                   | A-tDCS                            | Left motor cortex                                                                | 1 mA   | 20 min | 8 per group                                            | 2 weeks                                                               | Computer-assisted Naming Treatment                                                                                             |
| Branscheidt et al. | 2017 | 16 patients with chronic aphasia                                   | A-tDCS                            | Left primary motor cortex                                                        | 2 mA   | 20 min | 1 active, 1 sham                                       | 2 days + 7 days interval between conditions                           | Lexical Decision Task                                                                                                          |
| Darkow et al.      | 2017 | 16 patients with chronic aphasia                                   | A-tDCS                            | Left primary motor cortex                                                        | 1 mA   | 20 min | 1 active, 1 sham                                       | 2 days + 1 week interval between conditions                           | Picture-object naming of familiar terms                                                                                        |
| Marangolo et al.   | 2017 | 14 patients with chronic aphasia                                   | A-tDCS                            | 10th thoracic vertebra                                                           | 2 mA   | 20 min | 5 per condition                                        | 15 days + 6 days interval in between conditions                       | Verb and Noun Naming Task                                                                                                      |
| Norise et al.      | 2017 | 9 patients with chronic aphasia                                    | A-tDCS or C-tDCS                  | Left or right frontal areas                                                      | 2 mA   | 20 min | 1st phase: 1 per condition;<br>2nd phase: 10 per group | 2 months                                                              | Picture Naming Task                                                                                                            |
| Cramer             | 2018 | 74 patients                                                        | A-tDCS                            | Broca's Area                                                                     | 1 mA   | 45 min | 15 per group                                           | 3 weeks                                                               | Speech Therapy                                                                                                                 |
| Fridriksson et al. | 2018 | 74 patients with chronic aphasia                                   | A-tDCS                            | Perilesional areas                                                               | 1 mA   | 20 min | 15 per group                                           | 3 weeks                                                               | Computerised Anomia Treatment                                                                                                  |
| Fridriksson et al. | 2018 | 74 patients with chronic aphasia                                   | A-tDCS                            | Left temporoparietal areas                                                       | 1 mA   | 20 min | 15 per group                                           | 3 weeks                                                               | Picture-Word Matching Task                                                                                                     |
| Marangolo et al.   | 2018 | 12 patients with chronic aphasia                                   | C-tDCS                            | Right cerebellar hemisphere                                                      | 2 mA   | 20 min | 5 per condition                                        | 3 weeks                                                               | Language Treatment for Verb Improvement                                                                                        |

|                   |      |                                             |                    |                                                                            |                                   |        |                                      |                                                            |                                    |
|-------------------|------|---------------------------------------------|--------------------|----------------------------------------------------------------------------|-----------------------------------|--------|--------------------------------------|------------------------------------------------------------|------------------------------------|
| Pestalozzi et al. | 2018 | 14 patients with chronic aphasia            | A-tDCS             | Left prefrontal dorsolateral areas                                         | 1 mA                              | 20 min | 1 active, 1 sham                     | 2 days + 1 week interval between conditions                | Picture Naming Task and repetition |
| Spielmann et al.  | 2018 | 13 patients with chronic aphasia            | A-tDCS             | Broca's Area or left temporal areas                                        | 1 mA                              | 20 min | 2 active, 1 sham                     | 4 weeks                                                    | Word-Finding Therapy               |
| Woodhead et al.   | 2018 | 21 patients with chronic aphasia and alexia | A-tDCS             | Perilesional areas                                                         | 2 mA                              | 20 min | 11 per condition                     | 4 months                                                   | iReadMore                          |
| Fiori et al.      | 2019 | 20 patients with chronic aphasia            | C-HD-tDCS          | Broca's homologous areas of the right hemisphere                           | Group 1<br>1mA;<br>Group 2<br>2mA | 20 min | 5 per condition                      | 2 weeks + 1 week interval between condition                | Verb Naming Task                   |
| Stahl et al.      | 2019 | 26 patients with chronic aphasia            | A-tDCS             | Left motor cortex                                                          | 1 mA                              | 20 min | 12.5 hours weekly (2 daily sessions) | 3 weeks                                                    | Intensive Speech-Language Therapy  |
| Guillouët et al.  | 2020 | 10 patients with chronic aphasia            | Bihemispheric tDCS | Anode on Broca's area; cathode on homologous areas of the right hemisphere | 2 mA                              | 20 min | 15 per condition                     | 3 weeks per condition + 1 week interval between conditions | Speech and Language Therapy        |
| Ihara et al.      | 2020 | 6 patients with chronic aphasia             | A-tDCS             | Anode on Broca's area; cathode on homologous areas of the right hemisphere | 1.5 mA                            | 20 min | 4 per condition                      | 4 days + 3 weeks interval between conditions               | Word-Picture Matching Task         |
| Cherney et al.    | 2021 | 12 patients with chronic aphasia            | A-tDCS or C-tDCS   | Perilesional areas                                                         | 1 mA                              | 13 min | 30                                   | 6 weeks                                                    | Speech and Language Therapy        |
| Pisano et al      | 2021 | 14 patients with chronic aphasia            | Bihemispheric tDCS | Temporoparietal areas                                                      | 2 mA                              | 20 min | 10                                   | 2 weeks                                                    | Writing Tasks                      |
| Zhao et al.       | 2021 | 18 patients with chronic aphasia            | A-tDCS             | Left inferior frontal gyrus                                                | 2 mA                              | 20 min | 20                                   | 4 weeks                                                    | Speech and Language Therapy        |
